# Supplementary material for: Comparative Transcriptome Analysis Revealed Two Alternative Splicing bHLHs Account for Flower Color Alteration in Chrysanthemum
Source: MDPI journal article supplement (doi:10.3390/ijms222312769), 2021-11-25
Supplement: s1 [file s1]

Table S1. Primers used for qRT-PCR

| Gene             | Forward (5'-3')          | Reverse(5'-3')            |
|------------------|--------------------------|---------------------------|
| <i>CmMYB6</i>    | ACGGCGAAATAGGGTGGTCATTAG | GGATTGCAATATCATAGTTGGTCCG |
| <i>CmMYB#7</i>   | TACAGGATGCACAAGCTTGTTG   | ACATCGTATGAGACAAAGTGTC    |
| <i>CmbHLH2</i>   | GGGTTGTTGCTTGACGTGATGAAG | GCTAATTTTCTTCCCCCTAATACC  |
| <i>CmbHLH2.1</i> | ACCGTTCAATCCTGTGTCG      | CGTCGTTCAAGCAAGAGC        |
| <i>CmCHS</i>     | CAAGGAGGAGAAGATGAGAG     | CCGAACCCGAATAAAACAC       |
| <i>CmCHI</i>     | GCAGGTGTGAGAGGTATG       | GCAACGGAATCGCTTTATC       |
| <i>CmF3H</i>     | CACGGGTAATGTTAGGTAGG     | TGTAGGTCAAATCGGTCAAG      |
| <i>CmF3'H</i>    | AGGCGGATTCATCGTTTC       | ACTCTTTGGGCTTATCAGG       |
| <i>CmDFR</i>     | TAGTAACAAAGGCGGACAC      | GGATTATTCACCAAGTATGCTC    |
| <i>CmANS</i>     | GGGCTCCAACACTACTCTATG    | TCCTAACCTTCTCCTTATTCAC    |
| <i>CmUGT</i>     | ATCACAGGGACTATCAACC      | TCCACCACCAGACAACATA       |
| <i>CmGST</i>     | CCAAAAATGGGTGGTAAAA      | TAAGATCCGCAAGGGTGAA       |

Table S2. Primers used for LUC vector construction

|                | Forward (5'-3')                                    | Reverse(5'-3')                                      |
|----------------|----------------------------------------------------|-----------------------------------------------------|
| <i>CmMYB6</i>  | CAGCCCGGGG <u>GATCC</u> GTAATGTTGCATGTAT<br>CCAAAC | TGGCGTCTT <u>CCATGG</u> TTTTACTCTTATATCCCT<br>AATTG |
| <i>CmMYB#7</i> | CAGCCCGGGG <u>GATCC</u> GTAATCCAGATATCAT<br>GAGTGG | TGGCGTCTT <u>CCATGG</u> CAGTTGAAAGGATAGGT<br>TAGG   |
| <i>CmbHLH2</i> | CAGCCCGGGG <u>GATCC</u> GGAAGCAAGTAAATC<br>GGAGG   | TGGCGTCTT <u>CCATGG</u> CGCTAACCACCTCCTTA<br>GCTTC  |

Note: Added restriction enzyme sites are underlined
